# Supplementary material for: A Prediction Model for Tumor Recurrence in Stage II–III Colorectal Cancer Patients: From a Machine Learning Model to Genomic Profiling
Source: MDPI journal article supplement (doi:10.3390/biomedicines10020340), 2022-02-01
Supplement: s1 [file s1]

Supplementary Table S1. Optimal Cutoff Score by Youden Index

| Cutoff | Youden index |
|--------|--------------|
| 0.10   | 0.2665       |
| 0.15   | 0.3118       |
| 0.20   | 0.2138       |
| 0.25   | 0.0591       |
| 0.30   | 0.1380       |
| 0.35   | 0.1168       |
| 0.40   | 0.0634       |
| 0.45   | 0.0045       |
| 0.50   | 0.0100       |
| 0.55   | 0.0156       |
| 0.60   | 0.0211       |
| 0.65   | 0.0211       |
| 0.70   | 0.0267       |
