# Supplementary material for: A Prediction Model for Tumor Recurrence in Stage II–III Colorectal Cancer Patients: From a Machine Learning Model to Genomic Profiling
Source: MDPI journal article supplement (doi:10.3390/biomedicines10020340), 2022-02-01
Supplement: s1 [file s1]

**Supplementary Table S2. Prognostic factors for cancer recurrence in different machine learning models**

|      | <b>pT</b> | <b>Tumor Volume</b> | <b>Age</b> | <b>Tumor Size</b> | <b>CCRT</b> | <b>PNI</b> | <b>Tumor Site</b> | <b>LNR</b> | <b>LVI</b> |
|------|-----------|---------------------|------------|-------------------|-------------|------------|-------------------|------------|------------|
| LR   |           |                     | V          | V                 | V           | V          |                   | V          |            |
| RF   | V         | V                   | V          |                   |             |            | V                 | V          |            |
| CART |           | V                   | V          |                   |             | V          |                   | V          | V          |

Abbreviations: pT: depth of tumor Invasion stage; CCRT: chemoradiotherapy; PNI: perineural invasion; LNR: lymph node ratio; LVI: lymphovascular invasion. LR: logistic regression; RF: Random forest; CART: classification and regression trees.
