# Supplementary material for: A Prediction Model for Tumor Recurrence in Stage II–III Colorectal Cancer Patients: From a Machine Learning Model to Genomic Profiling
Source: MDPI journal article supplement (doi:10.3390/biomedicines10020340), 2022-02-01
Supplement: s1 [file s1]

**Supplementary Table S7. Characteristics of Patients with Untreated Stage II Colorectal Cancer Patients**

| Characteristic           | Overall (N = 93) | Recurrence      |                |
|--------------------------|------------------|-----------------|----------------|
|                          |                  | Yes (n = 4)     | No (n = 89)    |
| Sex                      |                  |                 |                |
| Male                     | 45 (48.4%)       | 1 (25.0%)       | 44 (49.4%)     |
| Female                   | 48 (51.6%)       | 3 (75.0%)       | 45 (50.6%)     |
| Age(years)               | 74.71 (12.10)    | 67.50 (14.06)   | 75.03 (11.99)  |
| BMI                      | 23.34 (4.14)     | 24.72 (3.83)    | 23.27 (4.16)   |
| Radiotherapy             |                  |                 |                |
| No                       | 89 (95.7%)       | 4 (100.0%)      | 85 (95.5%)     |
| Yes                      | 4 (4.3%)         | 0 (0.0%)        | 4 (4.5%)       |
| Tumor site               |                  |                 |                |
| Right side colon         | 45 (48.9%)       | 2 (50.0%)       | 43 (48.9%)     |
| Left side colon          | 35 (38.0%)       | 1 (25.0%)       | 34 (38.6%)     |
| Rectum                   | 12 (13.0%)       | 1 (25.0%)       | 11 (12.5%)     |
| Tumor configuration      |                  |                 |                |
| Endophytic               | 49 (52.2%)       | 3 (75.0%)       | 45 (51.1%)     |
| Exophytic                | 44 (47.8%)       | 1 (25.0%)       | 43 (48.9%)     |
| Tumor size               |                  |                 |                |
| ≤ 3cm                    | 13 (14.3%)       | 2 (50.0%)       | 11 (12.6%)     |
| 3.1-5.9 cm               | 41 (45.1%)       | 0 (0.0%)        | 41 (47.1%)     |
| >= 6 cm                  | 37 (40.7%)       | 2 (50.0%)       | 35 (40.2%)     |
| Tumor volume             | 88.23 (293.21)   | 433.67 (569.60) | 76.04 (277.32) |
| Histology grade          |                  |                 |                |
| Poorly diff.             | 2 (2.3%)         | 0 (0.0%)        | 2 (2.4%)       |
| Moderately diff.         | 68 (77.3%)       | 3 (75.0%)       | 65 (77.4%)     |
| Well-diff.               | 18 (20.5%)       | 1 (25.0%)       | 17 (20.2%)     |
| Tumor invasion stage(pT) |                  |                 |                |
| 1-2                      | 0 (0.0%)         | 0 (0.0%)        | 0 (0.0%)       |
| 3                        | 84 (90.3%)       | 3 (75.0%)       | 81 (91.0%)     |
| 4                        | 9 (9.7%)         | 1 (25.0%)       | 8 (9.0%)       |
| Lymph nodes status(pN)   |                  |                 |                |
| 0                        | 84 (100.0%)      | 4 (100.0%)      | 80 (100.0%)    |
| 1                        | 0 (0.0%)         | 0 (0.0%)        | 0 (0.0%)       |
| 2                        | 0 (0.0%)         | 0 (0.0%)        | 0 (0.0%)       |
| LN metastasis numbers    | 0.00 (0.00)      | 0.00 (0.00)     | 0.00 (0.00)    |
| Total harvested LNs      | 22.34 (11.42)    | 17.67 (15.50)   | 22.50 (11.34)  |
| LN ratio                 | 0.00 (0.00)      | 0.00 (0.00)     | 0.00 (0.00)    |
| Distal margin            |                  |                 |                |

|                         |             |            |             |
|-------------------------|-------------|------------|-------------|
| Uninvolved              | 90 (100.0%) | 4 (100.0%) | 86 (100.0%) |
| Involved                | 0 (0.0%)    | 0 (0.0%)   | 0 (0.0%)    |
| Circumferential margin  |             |            |             |
| Uninvolved              | 20 (90.9%)  | 1 (50.0%)  | 19 (95.0%)  |
| Involved                | 1 (4.5%)    | 1 (50.0%)  | 0 (0.0%)    |
| Cannot be assessed      | 1 (4.5%)    | 0 (0.0%)   | 1 (5.0%)    |
| Lymphovascular invasion |             |            |             |
| Absence                 | 84 (90.3%)  | 4 (100.0%) | 80 (89.9%)  |
| Present                 | 9 (9.7%)    | 0 (0.0%)   | 9 (10.1%)   |
| Perineural invasion     |             |            |             |
| Absence                 | 69 (74.2%)  | 3 (75.0%)  | 66 (74.2%)  |
| Present                 | 24 (25.8%)  | 1 (25.0%)  | 23 (25.8%)  |
| Tumor growth pattern    |             |            |             |
| Infiltrating            | 76 (83.5%)  | 3 (75.0%)  | 73 (83.9%)  |
| Pushing                 | 15 (16.5%)  | 1 (25.0%)  | 14 (16.1%)  |
| Tumor budding           |             |            |             |
| Absent                  | 39(88.6%)   | 1 (100.0%) | 38 (88.4%)  |
| Present                 | 5 (11.4%)   | 0 (0.0%)   | 5 (11.6%)   |
| TRG                     |             |            |             |
| 1-2                     | 0 (0.0%)    | 0 (0.0%)   | 0 (NA%)     |
| 3-5                     | 1 (100.0%)  | 1 (100.0%) | 0 (NA%)     |
| Neoadjuvant CCRT        |             |            |             |
| No                      | 92 (98.9%)  | 3 (75.0%)  | 89 (100.0%) |
| Yes                     | 1 (1.1%)    | 1 (25.0%)  | 0 (0.0%)    |
| dMMR                    |             |            |             |
| Loss                    | 12 (37.5%)  | 0 (0.0%)   | 12 (38.7%)  |
| Preserved               | 20 (62.5%)  | 1 (100.0%) | 19 (61.3%)  |
| BRAF_V600E_Stain        |             |            |             |
| Negative                | 14 (82.4%)  | 0 (NA%)    | 14 (82.4%)  |
| Positive                | 3 (17.6%)   | 0 (NA%)    | 3 (17.6%)   |
| Alive                   |             |            |             |
| Yes                     | 65 (69.9%)  | 2 (50.0%)  | 63 (70.8%)  |
| No                      | 28 (30.1%)  | 2 (50.0%)  | 26 (29.2%)  |

---
