# Supplementary material for: A Prediction Model for Tumor Recurrence in Stage II–III Colorectal Cancer Patients: From a Machine Learning Model to Genomic Profiling
Source: MDPI journal article supplement (doi:10.3390/biomedicines10020340), 2022-02-01
Supplement: s1 [file s1]

**Supplementary Table S8. Characteristics of Patients with Neoadjuvant Chemoradiotherapy**

| Characteristic | Overall (N = 120) | Recurrence    |             | P-Value |
|----------------|-------------------|---------------|-------------|---------|
|                |                   | Yes (n = 26 ) | No (n = 94) |         |
| yTNM stage     |                   |               |             | 0.499   |
| II             | 67 (55.8%)        | 13 (50.0%)    | 54 (57.4%)  |         |
| III            | 53 (44.2%)        | 13 (50.0%)    | 40 (42.6%)  |         |
| ypT            |                   |               |             | 0.003   |
| 1-2            | 10 (8.5%)         | 2 (8.0%)      | 8 (8.6%)    |         |
| 3              | 94 (79.7%)        | 15 (60.0%)    | 79 (84.9%)  |         |
| 4              | 14 (11.8%)        | 8 (32.0)      | 6 (6.5%)    |         |
| ypN            |                   |               |             | 0.482   |
| 0              | 53 (55.2%)        | 11 (45.8%)    | 42 (58.3%)  |         |
| 1              | 30 (31.3%)        | 10 (41.7%)    | 20 (27.8%)  |         |
| 2              | 13 (13.5%)        | 3 (12.5%)     | 10 (13.9%)  |         |
