# Supplementary material for: A Prediction Model for Tumor Recurrence in Stage II–III Colorectal Cancer Patients: From a Machine Learning Model to Genomic Profiling
Source: Biomedicines. 2022 Feb 1;10(2):340. doi: 10.3390/biomedicines10020340 (PMC8961774; doi:10.3390/biomedicines10020340)
Supplement: Supplementary file 1 [file biomedicines-10-00340-s001.zip]

Archive with 8 entries (8 files):
- Supplementary Table S1. Optimal Cutoff Score by Youden Index 1222V1.pdf
- Supplementary Table S2. Risk Factors 1222V1.pdf
- Supplementary Table S3. PIK3CA Gene Mutations 1221V.xlsx
- Supplementary Table S4. Oncomine Cancer Gene Mutation Panel v2.xlsx
- Supplementary Table S5. Clinical features of 123 patient with cancer gene panel.xlsx
- Supplementary Table S6. Genetic Variatns in 123 Cancer Patients with OCP.xlsx
- Supplementary Table S7. Untreated Stage II Colorectal Cancer Patients 1222V1.pdf
- Supplementary Table S8. Neoadjuvant Chemoradiotherapy1222V1 .pdf
