# Supplementary material for: A Prediction Model for Tumor Recurrence in Stage II–III Colorectal Cancer Patients: From a Machine Learning Model to Genomic Profiling
Source: Biomedicines. 2022 Feb 1;10(2):340. doi: 10.3390/biomedicines10020340 (PMC8961774; doi:10.3390/biomedicines10020340)
Supplement: Supplementary file 1 [file biomedicines-10-00340-s001.zip › Supplementary Table S3. PIK3CA Gene Mutations 1221V.xlsx]

## Sheet: pik3ca_variant_count
Supplementary Table S3. PIK3CA gene mutations
Chr	Start	End	Ref	Alt	Func_refGene	Gene_refGene	GeneDetail_refGene	ExonicFunc_refGene	AAChange_refGene	avsnp150	AF	AF_popmax	AF_male	AF_female	AF_raw	AF_afr	AF_sas	AF_amr	AF_eas	AF_nfe	AF_fin	AF_asj	AF_oth	non_topmed_AF_popmax	non_neuro_AF_popmax	non_cancer_AF_popmax	controls_AF_popmax	TaiwanBioBank	PopFreqMax	1000G_ALL	1000G_AFR	1000G_AMR	1000G_EAS	1000G_EUR	1000G_SAS	ExAC_ALL	ExAC_AFR	ExAC_AMR	ExAC_EAS	ExAC_FIN	ExAC_NFE	ExAC_OTH	ExAC_SAS	ESP6500siv2_ALL	ESP6500siv2_AA	ESP6500siv2_EA	CG46	cosmic90_coding	elder
chr3	178936091	178936091	G	A	exonic	PIK3CA	.	nonsynonymous SNV	PIK3CA:NM_006218:exon10:c.G1633A:p.E545K	rs104886003	.	.	.	.	.	.	.	.	.	.	.	.	.	.	.	.	.	.	0	.	.	.	.	.	.	0	0	0	0	0	0	0	0	.	.	.	.	ID=COSV55873239;OCCURENCE=21(salivary_gland),730(breast),6(penis),1(parathyroid),1(peritoneum),7(liver),78(oesophagus),7(gastrointestinal_tract_site_indeterminate),75(cervix),684(large_intestine),36(central_nervous_system),25(biliary_tract),52(ovary),16(vulva),2(bone),3(NS),2(haematopoietic_and_lymphoid_tissue),60(stomach),10(soft_tissue),9(kidney),202(urinary_tract),9(pancreas),1(pituitary),30(s…	1
chr3	178952085	178952085	A	G	exonic	PIK3CA	.	nonsynonymous SNV	PIK3CA:NM_006218:exon21:c.A3140G:p.H1047R	rs121913279	.	.	.	.	.	.	.	.	.	.	.	.	.	.	.	.	.	.	0	.	.	.	.	.	.	0	.	.	.	.	.	.	.	.	.	.	.	ID=COSV55873195;OCCURENCE=27(salivary_gland),1752(breast),1(parathyroid),17(liver),19(oesophagus),8(gastrointestinal_tract_site_indeterminate),7(cervix),2(meninges),445(large_intestine),49(central_nervous_system),12(biliary_tract),1(vulva),110(ovary),13(bone),17(NS),5(haematopoietic_and_lymphoid_tissue),48(stomach),49(urinary_tract),7(kidney),59(soft_tissue),10(pancreas),2(pituitary),12(skin),18(…	1
chr3	178916726	178916726	G	A	exonic	PIK3CA	.	nonsynonymous SNV	PIK3CA:NM_006218:exon2:c.G113A:p.R38H	rs772110575	.	.	.	.	.	.	.	.	.	.	.	.	.	.	.	.	.	.	0.0001	.	.	.	.	.	.	0	0	0.0001	0	0	0	0	0	.	.	.	.	ID=COSV55879949;OCCURENCE=1(cervix),9(large_intestine),4(central_nervous_system),2(stomach),2(prostate),1(upper_aerodigestive_tract),13(endometrium)	0
chr3	178916956	178916956	C	T	exonic	PIK3CA	.	stopgain	PIK3CA:NM_006218:exon2:c.C343T:p.R115X	rs768659103	.	.	.	.	.	.	.	.	.	.	.	.	.	.	.	.	.	.	0.0001	.	.	.	.	.	.	0	0	0	0.0001	0	0	0	0	.	.	.	.	.	0
chr3	178917525	178917525	C	T	exonic	PIK3CA	.	nonsynonymous SNV	PIK3CA:NM_006218:exon3:c.C400T:p.P134S	rs750545881	3.19e-05	0.0012	0	7.2e-05	3.18e-05	0	.	0.0012	0	0	0	0	0	0.0012	0.0018	.	0.0041	.	0.0002	.	.	.	.	.	.	0	0	0.0002	0	0	0	0	0	.	.	.	.	ID=COSV55945791;OCCURENCE=1(large_intestine)	0
chr3	178921540	178921540	C	T	exonic	PIK3CA	.	nonsynonymous SNV	PIK3CA:NM_006218:exon5:c.C1022T:p.A341V	.	.	.	.	.	.	.	.	.	.	.	.	.	.	.	.	.	.	.	.	.	.	.	.	.	.	.	.	.	.	.	.	.	.	.	.	.	.	ID=COSV55924130;OCCURENCE=1(central_nervous_system),1(upper_aerodigestive_tract)	0
chr3	178922318	178922318	G	A	exonic	PIK3CA	.	nonsynonymous SNV	PIK3CA:NM_006218:exon6:c.G1087A:p.G363R	.	.	.	.	.	.	.	.	.	.	.	.	.	.	.	.	.	.	.	.	.	.	.	.	.	.	.	.	.	.	.	.	.	.	.	.	.	.	.	0
chr3	178936093	178936093	G	C	exonic	PIK3CA	.	nonsynonymous SNV	PIK3CA:NM_006218:exon10:c.G1635C:p.E545D	rs121913275	.	.	.	.	.	.	.	.	.	.	.	.	.	.	.	.	.	.	.	.	.	.	.	.	.	.	.	.	.	.	.	.	.	.	.	.	.	ID=COSV55875881;OCCURENCE=8(breast),4(large_intestine),4(endometrium)	0
chr3	178936114	178936114	G	A	exonic	PIK3CA	.	stopgain	PIK3CA:NM_006218:exon10:c.G1656A:p.W552X	.	.	.	.	.	.	.	.	.	.	.	.	.	.	.	.	.	.	.	.	.	.	.	.	.	.	.	.	.	.	.	.	.	.	.	.	.	.	ID=COSV55928101;OCCURENCE=1(large_intestine)	0
chr3	178938823	178938823	G	A	exonic	PIK3CA	.	nonsynonymous SNV	PIK3CA:NM_006218:exon14:c.G2065A:p.E689K	.	.	.	.	.	.	.	.	.	.	.	.	.	.	.	.	.	.	.	.	.	.	.	.	.	.	.	.	.	.	.	.	.	.	.	.	.	.	.	0
chr3	178938934	178938934	G	A	exonic	PIK3CA	.	nonsynonymous SNV	PIK3CA:NM_006218:exon14:c.G2176A:p.E726K	rs867262025	.	.	.	.	.	.	.	.	.	.	.	.	.	.	.	.	.	.	.	.	.	.	.	.	.	.	.	.	.	.	.	.	.	.	.	.	.	ID=COSV55875460;OCCURENCE=45(breast),7(oesophagus),3(cervix),13(large_intestine),1(bone),9(urinary_tract),1(pancreas),1(skin),2(prostate),7(lung),3(thyroid),1(upper_aerodigestive_tract),1(endometrium)	0
chr3	178952007	178952007	A	G	exonic	PIK3CA	.	nonsynonymous SNV	PIK3CA:NM_006218:exon21:c.A3062G:p.Y1021C	rs121913288	.	.	.	.	.	.	.	.	.	.	.	.	.	.	.	.	.	.	.	.	.	.	.	.	.	.	.	.	.	.	.	.	.	.	.	.	.	ID=COSV55882161;OCCURENCE=1(breast),11(large_intestine),1(central_nervous_system),1(ovary),1(haematopoietic_and_lymphoid_tissue),5(stomach),1(urinary_tract),1(pancreas),1(skin),2(lung),29(endometrium)	0
chr3	178927980	178927980	T	C	exonic	PIK3CA	.	nonsynonymous SNV	PIK3CA:NM_006218:exon8:c.T1258C:p.C420R	rs121913272	.	.	.	.	.	.	.	.	.	.	.	.	.	.	.	.	.	.	.	.	.	.	.	.	.	.	.	.	.	.	.	.	.	.	.	.	.	ID=COSV55874020;OCCURENCE=3(salivary_gland),1(vulva),2(ovary),64(breast),2(NS),1(haematopoietic_and_lymphoid_tissue),4(stomach),3(urinary_tract),3(soft_tissue),4(oesophagus),1(skin),3(prostate),6(lung),1(thyroid),2(upper_aerodigestive_tract),30(large_intestine),4(central_nervous_system),1(biliary_tract),1(small_intestine),17(endometrium)	1
chr3	178916767	178916767	G	A	exonic	PIK3CA	.	nonsynonymous SNV	PIK3CA:NM_006218:exon2:c.G154A:p.E52K	.	.	.	.	.	.	.	.	.	.	.	.	.	.	.	.	.	.	.	.	.	.	.	.	.	.	.	.	.	.	.	.	.	.	.	.	.	.	.	1
chr3	178916824	178916824	G	A	exonic	PIK3CA	.	nonsynonymous SNV	PIK3CA:NM_006218:exon2:c.G211A:p.V71I	rs201269904	6.37e-05	0.0006	0.0001	0	6.37e-05	0.0001	.	0	0.0006	0	0	0	0	0.0007	0.0006	.	.	.	0	.	.	.	.	.	.	0	0	0	0	0	0	0	0	.	.	.	.	ID=COSV55904566;OCCURENCE=1(large_intestine),1(lung)	1
chr3	178917498	178917498	G	A	exonic	PIK3CA	.	nonsynonymous SNV	PIK3CA:NM_006218:exon3:c.G373A:p.V125M	.	.	.	.	.	.	.	.	.	.	.	.	.	.	.	.	.	.	.	.	.	.	.	.	.	.	.	.	.	.	.	.	.	.	.	.	.	.	.	1
chr3	178921552	178921552	A	T	exonic	PIK3CA	.	nonsynonymous SNV	PIK3CA:NM_006218:exon5:c.A1034T:p.N345I	rs1057519938	.	.	.	.	.	.	.	.	.	.	.	.	.	.	.	.	.	.	.	.	.	.	.	.	.	.	.	.	.	.	.	.	.	.	.	.	.	ID=COSV55902706;OCCURENCE=1(ovary),3(breast),1(prostate),1(large_intestine),2(central_nervous_system),4(endometrium)	1
chr3	178921553	178921553	T	A	exonic	PIK3CA	.	nonsynonymous SNV	PIK3CA:NM_006218:exon5:c.T1035A:p.N345K	rs121913284	.	.	.	.	.	.	.	.	.	.	.	.	.	.	.	.	.	.	.	.	.	.	.	.	.	.	.	.	.	.	.	.	.	.	.	.	.	ID=COSV55873276;OCCURENCE=2(salivary_gland),125(breast),4(oesophagus),10(large_intestine),5(central_nervous_system),1(biliary_tract),2(ovary),6(stomach),1(soft_tissue),5(urinary_tract),2(prostate),5(lung),1(upper_aerodigestive_tract),10(endometrium)	1
chr3	178921554	178921554	G	A	exonic	PIK3CA	.	nonsynonymous SNV	PIK3CA:NM_006218:exon5:c.G1036A:p.V346I	.	.	.	.	.	.	.	.	.	.	.	.	.	.	.	.	.	.	.	.	.	.	.	.	.	.	.	.	.	.	.	.	.	.	.	.	.	.	.	1
chr3	178922290	178922290	G	A	splicing	PIK3CA	NM_006218:exon6:c.1060-1G>A	.	.	.	.	.	.	.	.	.	.	.	.	.	.	.	.	.	.	.	.	.	.	.	.	.	.	.	.	.	.	.	.	.	.	.	.	.	.	.	.	.	1
chr3	178936095	178936095	A	G	exonic	PIK3CA	.	nonsynonymous SNV	PIK3CA:NM_006218:exon10:c.A1637G:p.Q546R	rs397517201	.	.	.	.	.	.	.	.	.	.	.	.	.	.	.	.	.	.	.	.	.	.	.	.	.	.	.	.	.	.	.	.	.	.	.	.	.	ID=COSV55876869;OCCURENCE=2(salivary_gland),24(breast),2(cervix),25(large_intestine),3(central_nervous_system),7(ovary),1(NS),1(stomach),1(urinary_tract),1(pancreas),1(skin),1(prostate),1(thyroid),3(upper_aerodigestive_tract),1(small_intestine),18(endometrium)	1
chr3	178938796	178938796	G	A	exonic	PIK3CA	.	nonsynonymous SNV	PIK3CA:NM_006218:exon14:c.G2038A:p.V680I	rs759150318	.	.	.	.	.	.	.	.	.	.	.	.	.	.	.	.	.	.	0	.	.	.	.	.	.	0	0	0	0	0	0	0	0	.	.	.	.	.	1
chr3	178938845	178938845	G	A	exonic	PIK3CA	.	nonsynonymous SNV	PIK3CA:NM_006218:exon14:c.G2087A:p.G696E	.	.	.	.	.	.	.	.	.	.	.	.	.	.	.	.	.	.	.	.	.	.	.	.	.	.	.	.	.	.	.	.	.	.	.	.	.	.	ID=COSV55963537;OCCURENCE=1(skin)	1
chr3	178938849	178938849	G	A	exonic	PIK3CA	.	nonsynonymous SNV	PIK3CA:NM_006218:exon14:c.G2091A:p.M697I	rs866824713	.	.	.	.	.	.	.	.	.	.	.	.	.	.	.	.	.	.	.	.	.	.	.	.	.	.	.	.	.	.	.	.	.	.	.	.	.	ID=COSV55927617;OCCURENCE=2(upper_aerodigestive_tract)	1
chr3	178952039	178952039	G	A	exonic	PIK3CA	.	nonsynonymous SNV	PIK3CA:NM_006218:exon21:c.G3094A:p.E1032K	.	.	.	.	.	.	.	.	.	.	.	.	.	.	.	.	.	.	.	.	.	.	.	.	.	.	.	.	.	.	.	.	.	.	.	.	.	.	ID=COSV55968405;OCCURENCE=1(large_intestine)	1
chr3	178952078	178952078	G	A	exonic	PIK3CA	.	nonsynonymous SNV	PIK3CA:NM_006218:exon21:c.G3133A:p.D1045N	.	.	.	.	.	.	.	.	.	.	.	.	.	.	.	.	.	.	.	.	.	.	.	.	.	.	.	.	.	.	.	.	.	.	.	.	.	.	ID=COSV55874677;OCCURENCE=2(liver),5(large_intestine),1(stomach),1(haematopoietic_and_lymphoid_tissue),2(lung),1(small_intestine)	1
chr3	178936082	178936082	G	A	exonic	PIK3CA	.	nonsynonymous SNV	PIK3CA:NM_006218:exon10:c.G1624A:p.E542K	rs121913273	.	.	.	.	.	.	.	.	.	.	.	.	.	.	.	.	.	.	.	.	.	.	.	.	.	.	.	.	.	.	.	.	.	.	.	.	.	ID=COSV55873227;OCCURENCE=11(salivary_gland),475(breast),4(penis),11(liver),27(oesophagus),2(genital_tract),5(gastrointestinal_tract_site_indeterminate),34(cervix),431(large_intestine),23(central_nervous_system),11(biliary_tract),6(vulva),35(ovary),1(bone),4(NS),32(stomach),4(haematopoietic_and_lymphoid_tissue),11(kidney),16(soft_tissue),110(urinary_tract),5(pancreas),1(pituitary),34(skin),4(pros…	2
[truncated: 1 more columns]
