# Supplementary material for: A Prediction Model for Tumor Recurrence in Stage II–III Colorectal Cancer Patients: From a Machine Learning Model to Genomic Profiling
Source: Biomedicines. 2022 Feb 1;10(2):340. doi: 10.3390/biomedicines10020340 (PMC8961774; doi:10.3390/biomedicines10020340)
Supplement: Supplementary file 1 [file biomedicines-10-00340-s001.zip › Supplementary Table S4. Oncomine Cancer Gene Mutation Panel v2.xlsx]

## Sheet: 工作表1
Supplementary Table S4. Oncomine Cancer Gene Mutation Panel v2
ABL1
ACVRL1
AKT1
AKT3
ALK
APC
APEX1
AR
ARAF
ATM
ATP11B
AXL
BAP1
BCL2L1
BCL9
BIRC2
BIRC3
BRAF
BRCA1
BRCA2
BTK
CBL
CCND1
CCNE1
CD274
CD44
CDH1
CDK4
CDK6
CDKN2A
CHEK2
CSF1R
CSNK2A1
CTNNB1
DCUN1D1
DDR2
DNMT3A
EGFR
ERBB2
ERBB3
ERBB4
ERG
ESR1
ETV1
ETV4
ETV5
EZH2
FBXW7
FGFR1
FGFR2
FGFR3
FGFR4
FLT3
FOXL2
GAS6
GATA2
GATA3
GNA11
GNAQ
GNAS
HNF1A
HRAS
IDH1
IDH2
IFITM1
IFITM3
IGF1R
IL6
JAK1
JAK2
JAK3
KDR
KIT
KNSTRN
KRAS
MAGOH
MAP2K1
MAP2K2
MAPK1
MAX
MCL1
MDM2
MDM4
MED12
MET
MLH1
MPL
MSH2
MTOR
MYC
MYCL
MYCN
MYD88
MYO18A
NF1
NF2
NFE2L2
NKX2-1
NKX2-8
NOTCH1
NPM1
NRAS
NTRK1
NTRK3
PAX5
PDCD1LG2
PDGFRA
PIK3CA
PIK3R1
PNP
PPARG
PPP2R1A
PTCH1
PTEN
PTPN11
RAC1
RAF1
RB1
RET
RHEB
RHOA
ROS1
RPS6KB1
SF3B1
SMAD4
SMARCB1
SMO
SOX2
SPOP
SRC
STAT3
STK11
TERT
TET2
TIAF1
TP53
TSC1
TSC2
U2AF1
VHL
WT1
XPO1
ZNF217
