# Supplementary material for: A Prediction Model for Tumor Recurrence in Stage II–III Colorectal Cancer Patients: From a Machine Learning Model to Genomic Profiling
Source: Biomedicines. 2022 Feb 1;10(2):340. doi: 10.3390/biomedicines10020340 (PMC8961774; doi:10.3390/biomedicines10020340)
Supplement: Supplementary file 1 [file biomedicines-10-00340-s001.zip › Supplementary Table S5. Clinical features of 123 patient with cancer gene panel.xlsx]

## Sheet: Supplementary Table 4_v2
Supplementary Table S5. Clinical Characteristics of 123 Patients with Cancer Gene Panel
original ID	sample ID	Age when diagnosis	>=65 y/o	Recurrence or not	RFS (months)	Survival or not	Duration of survival (months)	Gender	Site	Differentiation	T	N	Stage	MMR
CRC_00055584	CRC001	58	0	0	69.9667	0	69.9667	Male	Left	Moderately	3	1	3	0
CRC_00228512	CRC002	34	0	0	43.2333	0	43.2333	Male	Right	Moderately	4	0	2	1
CRC_00278892	CRC003	76	1	0	47.0667	0	47.0667	Female	Left	Moderately	4	1	3	0
CRC_00342504	CRC004	59	0	1	0.933333	1	42.2333	Female	Right	Moderately	3	2	3	0
CRC_00636449	CRC005	69	1	1	33.4667	0	115.567	Male	Left	Moderately	2	2	3	0
CRC_00685983	CRC006	74	1	1	7	1	14.6	Male	Right	Moderately	3	2	3	0
CRC_00726485	CRC007	40	0	0	124.667	0	124.667	Male	Right	Moderately	3	2	3	0
CRC_00987838	CRC008	76	1	1	18.9667	0	53.0333	Female	Right	Moderately	3	1	3	0
CRC_01084017	CRC009	63	0	0	67.6	0	67.6	Female	Left	Moderately	1	1	3	0
CRC_01285682	CRC010	64	0	1	14.5667	1	42.4667	Male	Left	Moderately	3	0	2	0
CRC_01553756	CRC011	53	0	0	100.333	0	100.333	Female	Left	Moderately	3	1	3	0
CRC_01633618	CRC012	48	0	0	53.6667	0	53.6667	Male	Right	Moderately	3	1	3	0
CRC_02072553	CRC013	56	0	0	64.2	0	64.2	Female	Left	Moderately	2	1	3	0
CRC_02182951	CRC014	57	0	0	56.5333	0	56.5333	Female	Right	Moderately	2	1	3	0
CRC_02454014	CRC015	57	0	0	83.2333	0	83.2333	Male	Left	Moderately	3	1	3	0
CRC_02818038	CRC016	54	0	1	13.1333	1	23.1	Male	Left	Moderately	3	1	3	0
CRC_02844190	CRC017	61	0	1	20.6333	1	49.2	Female	Left	Moderately	4	2	3	0
CRC_03128218	CRC018	75	1	1	23.6333	0	59.7	Female	Left	Moderately	3	1	3	0
CRC_03246011	CRC019	66	1	1	16.1667	0	52.5333	Female	Left	Moderately	2	1	3	0
CRC_03386476	CRC020	54	0	1	29.2333	0	29.2333	Male	Left	Moderately	3	2	3	0
CRC_03609312	CRC021	73	1	0	62.9333	0	62.9333	Male	Right	Moderately	3	1	3	0
CRC_03861598	CRC022	47	0	0	47.1333	0	47.1333	Female	Left	Moderately	3	1	3	0
CRC_03898564	CRC023	75	1	0	29.2333	0	29.2333	Female	Left	Moderately	2	1	3	0
CRC_03966621	CRC024	78	1	0	22.3333	1	22.3333	Male	Left	Moderately	3	1	3	0
CRC_04412478	CRC025	45	0	0	34.0667	0	34.0667	Female	Left	Moderately	3	2	3	0
CRC_04420640	CRC026	50	0	0	41.2333	0	41.2333	Female	Right	Moderately	3	1	3	0
CRC_04524186	CRC027	51	0	0	85.9	0	85.9	Female	Left	Well	2	1	3	0
CRC_04798523	CRC028	66	1	0	90.7333	0	90.7333	Female	Left	Mucinous adenocarcinoma_x000D_ (Moderately differentiated)	3	0	2	0
CRC_05608103	CRC029	67	1	1	18.6	0	49.6333	Male	Left	Moderately	3	1	3	0
CRC_05625406	CRC030	39	0	0	82.1667	0	82.1667	Female	Left	Poorly	3	2	3	0
CRC_05700928	CRC031	68	1	0	40.3	0	40.3	Female	Right	Moderately	3	2	3	0
CRC_05735040	CRC032	60	0	0	23.4	1	23.4	Male	Left	Moderately	3	1	3	0
CRC_05819577	CRC033	68	1	0	66.3	0	66.3	Male	Left	Moderately	2	2	3	0
CRC_05988807	CRC034	43	0	0	29.6	0	29.6	Female	Left	Moderately	3	1	3	0
CRC_06074771	CRC035	58	0	1	28.6	0	131.667	Female	Left	Poorly	3	1	3	0
CRC_06096087	CRC036	54	0	0	62.4	0	62.4	Male	Left	Moderately	3	1	3	0
CRC_06115914	CRC037	51	0	0	86.4	0	86.4	Female	Left	Moderately	3	1	3	0
CRC_06145023	CRC038	61	0	0	37	0	37	Male	Left	Mucinous adenocarcinoma_x000D_ (Moderately differentiated)	3	0	2	1
CRC_06281512	CRC039	47	0	1	12.1	0	31.2667	Female	Left	Moderately	3	1	3	0
CRC_06341067	CRC040	50	0	0	33.2667	0	33.2667	Male	Left	Moderately	3	2	3	0
CRC_06386810	CRC041	58	0	1	26.9	1	51.1	Female	Left	Moderately	4	1	3	0
CRC_06673270	CRC042	56	0	0	19.9333	0	19.9333	Male	Right	Moderately	3	1	3	0
CRC_06793118	CRC043	36	0	0	103.6	0	103.6	Male	Left	Moderately	3	1	3	0
CRC_07001868	CRC044	56	0	0	102.533	0	102.533	Male	Left	Well	3	1	3	0
CRC_07366605	CRC045	73	1	0	17.2333	0	17.2333	Male	Left	Poorly	3	1	3	0
CRC_07481200	CRC046	63	0	0	60.1667	0	60.1667	Male	Left	Moderately	3	1	3	0
CRC_07579253	CRC047	44	0	1	14.6333	0	65.5	Female	Left	Moderately	3	1	3	0
CRC_07684350	CRC048	52	0	0	148.433	0	148.433	Female	Right	Moderately	3	1	3	0
CRC_07806301	CRC049	60	0	0	43.1333	0	43.1333	Male	Left	Moderately	3	1	3	0
CRC_07823387	CRC050	37	0	0	69.3333	0	69.3333	Female	Left	Moderately	3	1	3	0
CRC_07875744	CRC051	74	1	0	68.4667	0	68.4667	Female	Left	Moderately	3	1	3	0
CRC_07982423	CRC052	67	1	1	39.4667	0	58.7	Male	Right and Left	Mucinous adenocarcinoma(Cecum)_x000D_ Moderately differentiated	3	2	3	0
CRC_08367779	CRC053	50	0	0	30.2333	0	30.2333	Female	Left	Moderately	2	1	3	0
CRC_08472067	CRC054	57	0	0	50.2	0	50.2	Female	Right	Moderately	3	2	3	1
CRC_08592662	CRC055	70	1	0	91.5333	0	91.5333	Female	Left	Moderately	3	1	3	0
CRC_08664174	CRC056	55	0	0	94.5	0	94.5	Female	Left	Moderately	3	1	3	0
CRC_08910521	CRC057	43	0	0	53.1667	0	53.1667	Male	Left	Moderately	3	1	3	0
CRC_09114376	CRC058	70	1	1	38.8667	0	48.1333	Female	Left	Moderately	3	1	3	0
CRC_09516150	CRC059	46	0	0	20.2333	0	20.2333	Male	Left	Moderately	3	1	3	0
CRC_09617087	CRC060	49	0	0	86.8667	0	86.8667	Male	Left	Moderately	3	2	3	0
CRC_09800448	CRC061	56	0	1	18.4667	0	18.4667	Male	Left	Moderately	4	1	3	0
CRC_10388192	CRC062	60	0	1	14.1	1	28.5667	Female	Left	Well	3	1	3	0
CRC_10433123	CRC063	58	0	1	26.4667	0	61.2333	Female	Left	Moderately	3	1	3	0
CRC_10450688	CRC064	29	0	0	43.3	0	43.3	Male	Right	Mucinous adenocarcinoma_x000D_ (poorly differentiated )	4	2	3	0
CRC_10510890	CRC065	65	1	0	70.7667	0	70.7667	Male	Left	Moderately	3	1	3	0
CRC_10586200	CRC066	68	1	0	45.4	0	45.4	Female	Right	Moderately	3	2	3	0
CRC_10868418	CRC067	69	1	0	55.2333	0	55.2333	Male	Left	Moderately	3	2	3	0
CRC_10894554	CRC068	62	0	0	76.5333	0	76.5333	Male	Left	Moderately	4	2	3	0
CRC_10951830	CRC069	49	0	1	9.93333	1	21.4333	Female	Left	Moderately	3	2	3	0
CRC_11231927	CRC070	52	0	0	65.8	0	65.8	Male	Left	Moderately	3	1	3	0
CRC_11569387	CRC071	47	0	0	71.7	0	71.7	Female	Right	Moderately	3	2	3	0
CRC_11771746	CRC072	52	0	0	170.067	0	170.067	Male	Right	Mucinous adenocarcinoma	4	0	2	1
CRC_11972104	CRC073	52	0	0	36.6333	0	36.6333	Male	Left	Moderately	3	1	3	0
CRC_12021931	CRC074	74	1	0	84.0333	0	84.0333	Male	Left	Mucinous adenocarcinoma_x000D_ (moderately differentiated)	3	1	3	0
CRC_12108307	CRC075	41	0	0	66.3333	0	66.3333	Male	Left	Poorly	3	2	3	0
CRC_12362026	CRC076	69	1	1	18	0	56.9667	Male	Left	Moderately	3	1	3	0
CRC_13104390	CRC077	45	0	0	71.4	0	71.4	Male	Right	poorly	4	2	3	1
CRC_13564833	CRC078	30	0	0	131.2	0	131.2	Male	Left	Moderately	3	0	2	0
CRC_13854239	CRC079	53	0	0	121.633	0	121.633	Male	Left	Moderately	3	1	3	0
CRC_14507109	CRC080	36	0	0	114.333	0	114.333	Female	Left	Moderately	4	1	3	0
CRC_14999003	CRC081	38	0	0	69.2667	0	69.2667	Female	Left	Moderately	3	1	3	0
CRC_15024162	CRC082	53	0	0	40.3333	0	40.3333	Female	Left	Moderately	3	1	3	0
CRC_15125455	CRC083	61	0	0	100.833	0	100.833	Female	Right	Mucinous adenocarcinoma_x000D_ (moderately differentiated)	3	2	3	0
CRC_15337160	CRC084	49	0	0	98.1667	0	98.1667	Female	Left	Well	3	1	3	0
CRC_15607609	CRC085	64	0	1	52.5	0	89.4333	Male	Left	Moderately	3	1	3	0
CRC_15612026	CRC086	59	0	0	57.1	0	57.1	Female	Left	Well	3	1	3	0
CRC_15953069	CRC087	58	0	0	73.3333	0	73.3333	Female	Left	Moderately	3	1	3	1
CRC_15961202	CRC088	63	0	0	60.5667	0	60.5667	Male	Left	Moderately	3	2	3	0
CRC_16192078	CRC089	61	0	0	76.8333	0	76.8333	Male	Left	Moderately	3	1	3	0
CRC_16319977	CRC090	51	0	1	16.3	1	42	Male	Left	Mucinous adenocarcinoma_x000D_ (well differentiated)	4	1	3	0
CRC_16343402	CRC091	64	0	0	75.1333	0	75.1333	Male	Left	Moderately	4	1	3	0
CRC_16344727	CRC092	62	0	0	72.1667	0	72.1667	Female	Left	Moderately	1	2	3	0
CRC_16678279	CRC093	47	0	1	24.7667	0	55.8333	Female	Left	Mucinous adenocarcinoma_x000D_ (Moderately differentiated)	3	2	3	0
CRC_16721194	CRC094	41	0	0	67.8667	0	67.8667	Male	Left	Moderately	4	1	3	0
CRC_16762327	CRC095	61	0	1	16.2333	0	40.9	Female	Left	Moderately	4	1	3	0
CRC_16768396	CRC096	68	1	0	68.5333	0	68.5333	Female	Left	Moderately	1	1	3	0
CRC_16776665	CRC097	64	0	1	47.5333	1	64.3333	Female	Right	Well	3	0	2	0
CRC_16877725	CRC098	58	0	0	3.3	0	3.3	Male	Unknown	Poorly	3	0	2	1
CRC_16914775	CRC099	72	1	0	62.0667	0	62.0667	Male	Left	Moderately	3	2	3	0
CRC_16938760	CRC100	45	0	1	24.9333	0	66.3	Female	Left	Well	1	1	3	0
CRC_16954874	CRC101	65	1	1	21.9333	0	55.7667	Male	Left	Moderately	4	2	3	0
CRC_16978584	CRC102	72	1	0	63.1	0	63.1	Male	Left	Moderately	3	2	3	0
CRC_16992870	CRC103	63	0	1	9.63333	1	38.3667	Female	Right	Moderately	4	1	3	1
CRC_17050738	CRC104	53	0	0	61.1333	0	61.1333	Female	Left	Moderately	3	1	3	0
CRC_17123248	CRC105	54	0	0	49.7	0	49.7	Female	Left	Moderately	1	1	3	0
CRC_17199483	CRC106	62	0	1	17.7333	1	40.6	Male	Left	Moderately	3	1	3	0
CRC_17267281	CRC107	52	0	1	8.9	0	56.7	Male	Left	Moderately	3	2	3	0
CRC_17353212	CRC108	66	1	1	32.3667	0	53.4667	Male	Left	Moderately	3	1	3	0
CRC_17374504	CRC109	69	1	1	13.8	0	51	Male	Left	Moderately	4	1	3	0
CRC_17376351	CRC110	40	0	1	22.5667	0	51.0667	Male	Left	Moderately	3	2	3	0
CRC_17498305	CRC111	46	0	0	52.8333	0	52.8333	Male	Right	Mucinous adenocarcinoma_x000D_ (moderately differentiated)	4	2	3	0
CRC_17503004	CRC112	67	1	0	55.5333	0	55.5333	Female	Right	Moderately	3	1	3	0
CRC_17505916	CRC113	51	0	0	50.8667	0	50.8667	Female	Left	Moderately	3	1	3	0
CRC_17533016	CRC114	55	0	0	50.7667	0	50.7667	Female	Left	Moderately	2	1	3	0
CRC_17633181	CRC115	52	0	0	51.8	0	51.8	Female	Left	Moderately	3	2	3	0
CRC_17643126	CRC116	52	0	0	37.0667	0	37.0667	Male	Left	Mucinous adenocarcinoma_x000D_ (Moderately differentiated)	4	1	3	0
CRC_17741185	CRC117	39	0	0	27.1667	0	27.1667	Male	Right	Moderately	3	1	3	0
CRC_17769279	CRC118	47	0	0	45.5	0	45.5	Male	Right	Moderately	3	2	3	0
CRC_17937223	CRC119	29	0	0	46.9	0	46.9	Male	Right	Moderately	3	1	3	1
CRC_17980497	CRC120	40	0	0	45.6	0	45.6	Female	Left	Moderately	4	1	3	0
CRC_18245096	CRC121	56	0	0	39.8	0	39.8	Male	Left	Moderately	3	1	3	0
CRC_18931566	CRC122	63	0	1	26.8	0	26.8	Male	Left	Moderately	3	1	3	0
CRC_19199531	CRC123	60	0	1	4.6	0	20.6	Female	Right	Moderately	3	2	3	0
